# 1 DNA methylation facilitates local adaptation and adaptive transgenerational 2 plasticity

3  
4 Melanie J. Heckwolf<sup>1\*</sup>, Britta S. Meyer<sup>1,##</sup>, Robert Häsler<sup>2</sup>, Marc P. Höppner<sup>2</sup>, Christophe  
5 Eizaguirre<sup>3</sup> and Thorsten B. H. Reusch<sup>1</sup>

6  
7 \* *equal contribution*

8 <sup>1</sup> *Marine Evolutionary Ecology, GEOMAR Helmholtz Centre for Ocean Research Kiel, Kiel,*  
9 *Germany*

10 <sup>#</sup> *present address: Max Planck Research Group Behavioural Genomics, Max Planck Institute for*  
11 *Evolutionary Biology, Plön, Germany*

12 <sup>2</sup> *Institute of Clinical Molecular Biology, Kiel University, Kiel, Germany*

13 <sup>3</sup> *School of Biological and Chemical Sciences, Queen Mary University of London, London, UK*

## 15 **Keywords**

16 DNA methylation, epigenetics, *Gasterosteus aculeatus*, local adaptation, phenotypic plasticity,  
17 reduced representation bisulfite sequencing, transgenerational acclimation

## 19 **Abstract**

20 Epigenetic inheritance has been suggested to contribute to adaptation via two distinct pathways.  
21 Either, stable epigenetic marks emerge as epimutations and are targets of natural selection via  
22 the phenotype, analogous to adaptation from DNA sequence-based variation. Alternatively,  
23 epigenetic marks are inducible by environmental cues, possibly representing one mechanism of  
24 transgenerational phenotypic plasticity. We investigated whether both postulated pathways are  
25 detectable in nature and sequenced methylomes and genomes of three-spined sticklebacks

26 (*Gasterosteus aculeatus*) across a natural salinity gradient in a space-for-time approach.  
27 Consistent with local adaptation patterns, stickleback populations showed differentially  
28 methylated CpG sites (pop-DMS) at genes enriched for osmoregulatory processes. In a two-  
29 generation salinity acclimation experiment with fish from the mid salinity, we found the majority  
30 (62%) of pop-DMS to be insensitive to experimental salinity change, suggesting that they were  
31 shaped by selection and facilitate local salinity adaptation. Among the experimentally inducible  
32 DMS, two-thirds increased in similarity to anticipated adaptive patterns in wild populations under  
33 exposure to the novel salinity. This study demonstrates the presence of two types of methylation  
34 marks, inducible and stable, that contribute to adaptive transgenerational plasticity and local  
35 adaptation in natural populations.

36

### 37 **Main text**

38 Recent advances in epigenetics have started to challenge our understanding of inheritance and  
39 adaptive evolution<sup>1, 2, 3</sup>. It has been suggested that epigenetic inheritance provides an additional  
40 evolutionary pathway to adaptive phenotypes<sup>4, 5</sup>, involving the heredity of molecular variation  
41 such as DNA methylation, histone modification and small RNAs<sup>6</sup>. Several theoretical models  
42 posit that heritable variation of these molecular modifications can contribute to adaptation to  
43 environmental change via two distinct information pathways<sup>5, 7, 8</sup>. Firstly, *selection-based*  
44 epigenetic marks can emerge as spontaneous epimutations that remain stable across  
45 generations, regardless of the current environment<sup>7</sup>. These epimutations underlie phenotypes  
46 that are targets of natural selection similar to adaptation from DNA sequence-based variation<sup>5, 8,</sup>  
47 <sup>9</sup>. Secondly, *detection-based* effects describe inducible epigenetic marks under environmental  
48 control and are hypothesized to be a transgenerational form of phenotypic plasticity<sup>7, 10</sup>. While  
49 the significance and principal difference of both transmission pathways have been  
50 acknowledged<sup>4, 5, 7</sup>, empirical evidence for the quantification of adaptive epigenetic variation  
51 along with its transgenerational inducibility is rare, especially in natural populations (but see

52 references<sup>10, 11, 12</sup>). One prime objective of this study was thus to assess whether these two  
53 epigenetic pathways can be detected in nature and to test whether short term acclimation  
54 responses match patterns of DNA methylation variation of natural populations. If  
55 transgenerational experiments result in DNA methylation profiles closer to those of locally  
56 adapted natural populations, this would provide evidence that DNA methylation is  
57 mechanistically involved in adaptive transgenerational plasticity.

58         Studying the adaptation to ocean salinity is particularly well suited to identify *selection-*  
59 *based* and *detection-based* effects, as changes in salinity are predicted to be gradual over time  
60 and experiments can easily be carried out with average values, as ocean salinity varies less  
61 depending on the season than temperature for instance. Since salinity change imposes strong  
62 physiological stress with well-defined cellular effects<sup>13</sup>, natural salinity gradients offer unparalleled  
63 opportunities to use local patterns of epigenetic variation as background against which direction  
64 and magnitude of experimental salinity manipulations can be tested. One suitable ecosystem to  
65 follow such a space-for-time approach is the Baltic Sea, a semi-enclosed marginal sea that has  
66 been dubbed a time machine for many predicted perturbations associated with global change<sup>14</sup>.

67         Taking advantage of this natural large-scale salinity gradient, we sequenced the  
68 methylomes (reduced representation bisulfite sequencing, RRBS) as well as whole genomes of  
69 three-spined sticklebacks (*Gasterosteus aculeatus*) from three locally adapted populations<sup>15</sup> in-  
70 and outside the Baltic Sea salinity gradient (6, 20 and 33 PSU). Baltic stickleback populations  
71 are genetically differentiated from one another (genome wide average pairwise  $F_{ST} = 0.028$  <sup>15</sup>)  
72 and show patterns consistent with local adaptation to salinity regimes in controlled common  
73 garden experiments<sup>16, 17</sup>. Furthermore, sticklebacks are known for their adaptive  
74 transgenerational plasticity in response to variation in temperature<sup>18</sup> and changes in DNA  
75 methylation levels at osmoregulatory genes in response to within generation salinity  
76 acclimation<sup>19, 20</sup>. However, it remains unclear whether DNA methylation facilitates adaptive  
77 transgenerational plasticity, a mechanism hypothesized to facilitate phenotypic adaptation to

78 rapid environmental change. To address this question, we complemented our field survey with a  
 79 two-generation salinity acclimation experiment using the mid salinity population (20 PSU) to  
 80 quantify the proportion of stable (potentially *selection-based*) and inducible (potentially *detection-*  
 81 *based*) DNA methylation within- and across generations (Figure 1). We focused on the  
 82 methylation of cytosines at cytosine-phosphate-guanine dinucleotides (CpG sites), the most  
 83 common methylation motif in vertebrates<sup>21</sup> with partial inheritance potentially facilitating  
 84 adaptation in natural populations<sup>10</sup>.

85 We tested three hypotheses: (i) Stickleback populations originating from different salinity  
 86 areas (6, 20 and 33 PSU) show differentially methylated CpG sites (pop-DMS), consistent with  
 87 patterns of local adaptation. (ii) Such pop-DMS include experimentally stable, in the form of  
 88 population-specific, and experimentally inducible, in the form of environment-specific,  
 89 methylation sites. (iii) Upon transgenerational salinity acclimation, inducible DNA methylations  
 90 become more similar to the patterns of natural populations at corresponding salinities. Along  
 91 with the functional enrichment assessment, the latter findings would be evidence of a  
 92 mechanism of adaptive transgenerational plasticity.

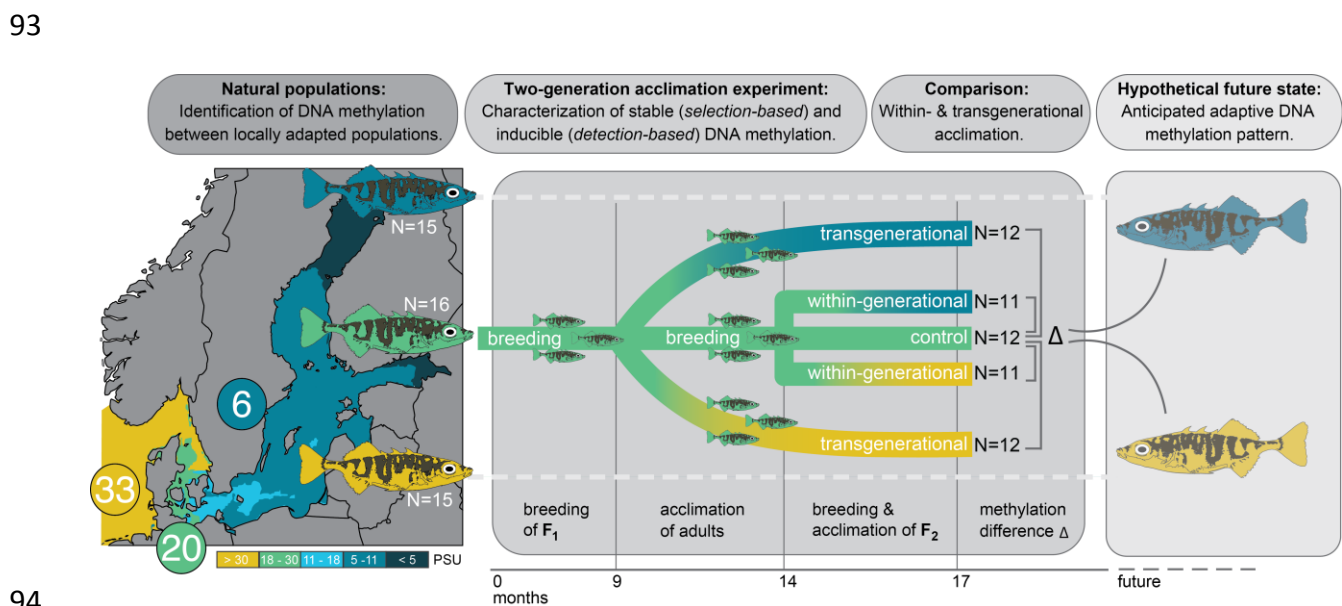

95 **Figure 1: Experimental space-for-time approach.** We characterized DNA methylation profiles (via  
 96 Reduced Representation Bisulfite Sequencing, RRBS) and whole genomes (Whole Genome Sequencing,

97 WGS) of fish from three populations of wild caught three-spined sticklebacks locally adapted to 6 (blue, N  
98 = 15), 20 (green, N = 16) and 33 PSU (yellow, N = 15). We also collected sticklebacks from the mid  
99 salinity location (20 PSU) and acclimated laboratory bred offspring of these fish within one ('within-  
100 generational') or over two ('transgenerational') generations to decreased (6 PSU) or increased (33 PSU)  
101 salinity, and maintained a control group at its original salinity (N = 11-12 per group, see details in Figure).  
102 Differential methylation within and across generations was assessed and compared to natural populations  
103 locally adapted to the corresponding salinity, serving as the hypothetical future DNA methylation state to  
104 capture long term adaptation processes.

105

## 106 **Identifying differentially methylated CpG sites across wild populations along a salinity**

### 107 **cline**

108 In order to identify differentially methylated CpG sites (DMS) between stickleback populations  
109 along the salinity cline in- and outside of the Baltic Sea (hereafter pop-DMS), we sequenced the  
110 methylome (RRBS) of 46 wild caught sticklebacks from 3 different salinity regimes (Sylt, 33  
111 PSU; Kiel, 20 PSU; Nynäshamn, 6 PSU; Figure 1). After quality and coverage filtering, we  
112 obtained 525,985 CpG sites present in all groups, corresponding to ~4% of all CpG sites in the  
113 stickleback genome. Between pairs of wild caught populations, we detected 1,470 (comparison  
114 20 vs. 6 PSU) and 1,158 (20 vs. 33 PSU) pop-DMS. The distribution of these sites was random  
115 with regard to the genomic features (promoter, exon, intron, and intergenic; 20 vs. 6 PSU:  $\chi^2_3 =$   
116 3.36,  $P = 0.340$ ; 20 vs. 33 PSU:  $\chi^2_3 = 1.61$ ,  $P = 0.656$ ; Supplementary Material: Figure S1 and  
117 Table S1) and regions along the chromosomes (Supplementary Figure S3A). Noteworthy,  
118 among these pop-DMS, 1,098 (20 vs. 6 PSU) and 871 (20 vs. 33 PSU) were located close to (<  
119 10 kb from transcription start sites) or within genes thereby associated with 655 and 510 genes,  
120 respectively. Many of these genes were involved in basic biological processes such as ectoderm  
121 development, DNA-repair and strand renaturation, as well as chromatid segregation and  
122 chromosome condensation (Figure 2). Particularly relevant and concordant with previous

123 findings of local salinity adaptation<sup>15</sup>, these genes were enriched for osmoregulatory processes  
124 such as ion transport and channel activity, renal water homeostasis and absorption. Genes  
125 associated with  $\geq 10$  pop-DMS are listed in Table 1 (for all genes, see Supplementary Table S2A  
126 and S2B). Since local adaptation is 10-fold more likely to involve changes at the gene  
127 expression than at the amino acid sequence level<sup>22, 23</sup>, it is conceivable that differential DNA  
128 methylation and consequently different regulation of osmoregulatory genes facilitates local  
129 adaptation to salinity. Remarkably, one of the top candidate genes differentially methylated  
130 between populations from 20 and 6 PSU was *eda* (*Ectodysplasin A*), a well-described gene  
131 involved in lateral plate formation<sup>24</sup>. Salinity and calcium are significant drivers of plate  
132 morphology<sup>25</sup> in proposed conjunction with predation<sup>26</sup>. Our findings suggest that repeated and  
133 parallel selection for the low plated *eda* allele in response to low saline habitats<sup>27, 28, 29</sup>, including  
134 the Baltic Sea<sup>15, 30</sup>, may involve methylation mechanisms. Taken all together, our results suggest  
135 that, along with genetic differentiation, differentially methylated genes likely contribute to local  
136 salinity adaptation across stickleback populations (Figure 2, Table 1; Supplementary Material:  
137 Figure S2, Table S2A and S2B). To further investigate this hypothesis, we experimentally  
138 characterized the proportion of stable (population-specific) and inducible (environment-specific)  
139 pop-DMS.

140

#### 141 **Characterizing stable and inducible DNA methylation in a two-generation experiment**

142 In order to distinguish between stable and inducible DNA methylation we then conducted a two-  
143 generation salinity acclimation experiment with laboratory bred sticklebacks from the mid salinity  
144 population (Figure 1). We considered pop-DMS to be stable when both the within- and the  
145 transgenerational acclimation group were not differentially methylated compared to the control  
146 group ( $q$ -value  $\geq 0.0125$ ). These population-specific and environmentally insensitive pop-DMS  
147 could be a target for natural selection via the phenotype (*sensu selection-based*<sup>7</sup>). On the other  
148 hand, if a pop-DMS was also differentially methylated between at least one of the acclimation

149 groups (within- and transgenerational) compared to the control group ( $q$ -value  $< 0.0125$ ;  
150 methylation difference  $\geq 15\%$ ) this site was considered inducible. Such environment-specific  
151 pop-DMS can facilitate adaptive transgenerational plasticity in response to environmental  
152 changes (*sensu detection-based*<sup>7</sup>). After two generations of salinity acclimation, we found that  
153 the majority of the pop-DMS remained stable, regardless of the direction of salinity change (926  
154 pop-DMS = 63% at decreased salinity; 694 pop-DMS = 60% at increased salinity). A smaller  
155 number of pop-DMS (13%) were inducible, as they showed a significant change in CpG  
156 methylation upon experimental salinity decrease (198 pop-DMS) or increase (148 pop-DMS). An  
157 additional 24% and 27% (346 and 316 pop-DMS respectively) differed significantly between  
158 experimental treatment groups, but did not exceed the minimum threshold in differential DNA  
159 methylation of 15% employed in this study. Interestingly, the number of inducible pop-DMS  
160 (13%) derived from comparisons between natural populations was significantly higher compared  
161 to what would be expected from a random selection of CpG sites across the genome ( $< 1\%$ ;  
162 1000 replicates; salinity decrease:  $X^2_2 = 1090.7$ ,  $P < 0.001$ ; salinity increase:  $X^2_2 = 967.7$ ,  $P <$   
163  $0.001$ ). This shows that a proportion of the pop-DMS reflects a salinity-mediated plastic  
164 response, as it is expected for *detection-based* sites<sup>7</sup>.

165

### 166 **Associating genes with stable and inducible DNA methylation**

167 We then assessed both stable and inducible pop-DMS for associations with different putative  
168 gene function (Figure 2, Supplementary Figure S2). Genes associated with stable pop-DMS  
169 (452 and 329 under salinity decrease and increase, respectively) were enriched for basic  
170 biological processes (e.g. DNA repair, chromatid segregation), but also for osmoregulatory  
171 functions (e.g. cation and proton channel activity; Figure 2). In line with mathematical models on  
172 the role of epigenetic and genetic changes in adaptive evolution<sup>5</sup>, these stable DNA methylation  
173 sites were potential targets for natural selection, resulting in differential DNA methylation  
174 between locally adapted populations. Inducible pop-DMS were associated with genes (100 and

175 82 under salinity decrease and increase, respectively) that were primarily enriched for other  
 176 osmoregulatory functions such as ion channel activity and homeostasis (Figure 2,  
 177 Supplementary Figure S2). We take this functional association as further evidence that inducible  
 178 pop-DMS, sensu *detection-based*<sup>7</sup>, are representing a molecular basis of adaptive phenotypic  
 179 plasticity by allowing individuals to regulate their ion balance relative to the seawater medium  
 180 instantaneously without requiring any further genetic adaptation at the population level.

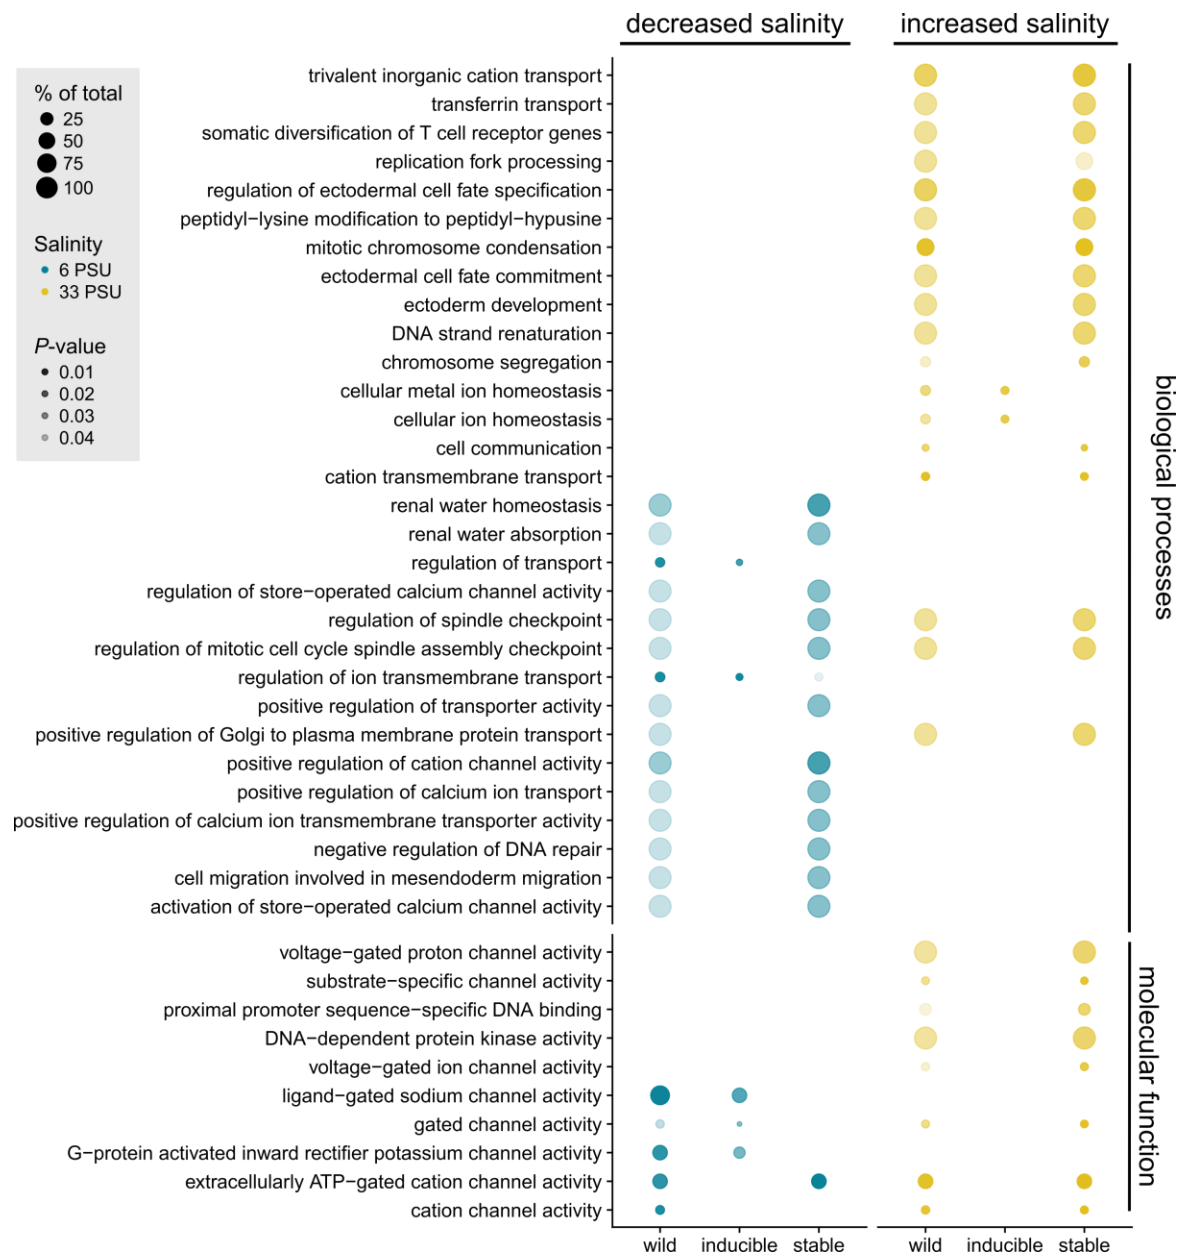

181  
 182  
 183

**Figure 2: Gene ontology terms for biological processes and molecular functions.**



184 Gene ontology (GO) terms for biological processes and molecular functions under salinity increase  
185 (yellow, 20 vs. 33 PSU) and decrease (blue, 20 vs. 6 PSU) associated with differentially methylated sites  
186 between populations (pop-DMS) are presented. The graph is split into GO terms associated with pop-  
187 DMS from natural stickleback populations across a salinity cline (wild) and their experimental inducibility  
188 (inducible and stable) in a two-generation acclimation experiment. The size of the circles refers to the  
189 number of genes of this term present in our groups (in %) and the transparency to the *P*-value (darker  
190 circles refer to a lower *P*-value). This subset is filtered for GO terms including the following keywords:  
191 "*anion*", "*cation*", "*channel*", "*transport*", "*water*", "*chloride*", "*potassium*", "*homeostasis*", "*DNA*",  
192 "*chromatid*", "*chromosome*", "*spindle*", "*ectoderm*", "*endoderm*", see Figure S2 (Supplementary Material)  
193 for the full figure.

| Ensembl gene ID           | chromosome   | start position  | end position    | gene name              | wild      | inducible | 'expected' inducible | 'opposite' inducible | stable   | semi-inducible | Fisher's exact ( <i>P</i> ) |
|---------------------------|--------------|-----------------|-----------------|------------------------|-----------|-----------|----------------------|----------------------|----------|----------------|-----------------------------|
| <i>Salinity decrease:</i> |              |                 |                 |                        |           |           |                      |                      |          |                |                             |
| ENSGACG00000008328        | Chr10        | 12860144        | 12863850        | si:dkey-166k12.1       | 24        | 0         | 0                    | 0                    | 9        | 15             | 0.005                       |
| <b>ENSGACG00000019416</b> | <b>Chr7</b>  | <b>4451892</b>  | <b>4453656</b>  | <b>HMX1 orthologue</b> | <b>17</b> | <b>0</b>  | <b>0</b>             | <b>0</b>             | <b>9</b> | <b>8</b>       | <b>0.033</b>                |
| <b>ENSGACG00000013229</b> | <b>Chr18</b> | <b>15327717</b> | <b>15352321</b> |                        | <b>15</b> | <b>0</b>  | <b>0</b>             | <b>0</b>             | <b>3</b> | <b>12</b>      | <b>0.011</b>                |
| ENSGACG000000017287       | Chr3         | 13454527        | 13465167        | mmp16b                 | 12        | 0         | 0                    | 0                    | 12       | 0              | 0.001                       |
| ENSGACG000000017584       | Chr3         | 14690814        | 14694448        | CCNY                   | 12        | 12        | 12                   | 0                    | 0        | 0              | 0.001                       |
| ENSGACG000000018249       | Chr4         | 12141625        | 12143011        | si:ch211-153b23.5      | 12        | 1         | 1                    | 0                    | 3        | 8              | 0.188                       |
| ENSGACG000000008034       | Chr6         | 9368187         | 9380941         |                        | 11        | 10        | 10                   | 0                    | 0        | 1              | 0.014                       |
| ENSGACG000000009469       | Chr1         | 9166576         | 9173856         | egln2                  | 11        | 0         | 0                    | 0                    | 11       | 0              | 0.001                       |
| ENSGACG000000004433       | Chr17        | 2127457         | 2211376         | igsf21a                | 10        | 10        | 10                   | 0                    | 0        | 0              | 0.003                       |
| ENSGACG000000007343       | Chr10        | 10666995        | 10679875        | col9a2                 | 10        | 0         | 0                    | 0                    | 6        | 4              | 0.227                       |
| ENSGACG000000018407       | Chr4         | 13828336        | 13837518        | Sncb                   | 10        | 2         | 2                    | 0                    | 5        | 3              | 0.848                       |
| <i>Salinity increase:</i> |              |                 |                 |                        |           |           |                      |                      |          |                |                             |
| ENSGACG000000020323       | Chr7         | 17010160        | 17011176        |                        | 23        | 0         | 0                    | 0                    | 22       | 1              | <0.001                      |
| <b>ENSGACG00000013229</b> | <b>Chr18</b> | <b>15327717</b> | <b>15352321</b> |                        | <b>15</b> | <b>10</b> | <b>10</b>            | <b>0</b>             | <b>1</b> | <b>4</b>       | <b>0.125</b>                |
| ENSGACG000000013359       | Chr11        | 12960883        | 12968110        | sec14l1                | 15        | 0         | 0                    | 0                    | 12       | 3              | 0.011                       |
| <b>ENSGACG00000019416</b> | <b>Chr7</b>  | <b>4451892</b>  | <b>4453656</b>  | <b>HMX1 orthologue</b> | <b>15</b> | <b>3</b>  | <b>3</b>             | <b>0</b>             | <b>5</b> | <b>7</b>       | <b>0.745</b>                |
| ENSGACG000000002948       | Chr8         | 218240          | 221355          | ddx10                  | 14        | 0         | 0                    | 0                    | 6        | 8              | 0.077                       |
| ENSGACG000000016350       | Chr14        | 3603545         | 3604923         |                        | 14        | 1         | 0                    | 1                    | 7        | 6              | 0.277                       |
| ENSGACG000000006636       | Chr18        | 4780893         | 4786820         | ZC3H12D                | 13        | 0         | 0                    | 0                    | 3        | 10             | 0.034                       |
| ENSGACG000000004667       | Chr12        | 4273498         | 4286193         | tti1                   | 12        | 0         | 0                    | 0                    | 12       | 0              | 0.001                       |
| ENSGACG000000015566       | Chr2         | 9043062         | 9051779         | casc4                  | 10        | 0         | 0                    | 0                    | 10       | 0              | 0.003                       |

194

195 **Table 1: Differentially methylated genes across natural populations along a salinity cline.**

196 Genes derived from DNA methylation comparisons between natural populations associated with  $\geq 10$  pop-DMS (decreased salinity: KIE (20 PSU) vs.  
197 NYN (6 PSU); increased salinity: KIE (20 PSU) vs. SYL (33 PSU)). Ensembl gene ID and name as well as the position on the chromosome are listed.  
198 The numbers refer to the numbers of DMS in the population comparison (wild). These DMS were classified into 'inducible', 'semi-inducible' and  
199 'stable' sites according to their behavior in a two-generation salinity acclimation experiment with laboratory bred sticklebacks from the mid salinity  
200 population (20 PSU) exposed to experimental salinity increase or decrease (33 and 6 PSU respectively). Further, inducible sites were distinguished  
201 whether they matched methylation levels of the locally adapted population ('expected') or not ('opposite'). Genes written in bold vary in both population

202 comparisons. We used a Fisher's exact test to assess whether pop-DMS associated to the same gene are correlated in their response to  
203 experimental salinity change (non-random distribution among the categories stable, inducible, semi-inducible) and reported corresponding *P*-values.  
204 For a full table on all genes associated with 1 or more pop-DMS see Table S2A and S2B (Supplementary Material).

## 205 **Assessing the role of experimentally inducible DNA methylation in nature**

206 We then assessed if multiple pop-DMS associated with the same gene showed a correlated  
207 response to experimental salinity acclimation, which would result in a non-random distribution of  
208 pop-DMS within genes among the categories ‘stable’, ‘inducible’ and ‘semi-inducible’. We found  
209 that in 13 out of 20 genes with  $\geq 10$  pop-DMS, these pop-DMS responded similarly across the  
210 gene upon salinity acclimation (Table 1, Fisher’s exact test,  $P < 0.05$ ). This non-random pattern  
211 of change provides additional evidence that we have identified inducible pop-DMS relevant to  
212 the *detection-based*<sup>7</sup> information pathway. Secondly, we tested whether a change at inducible  
213 pop-DMS in experimental fish increased the similarity to methylation patterns found in natural  
214 populations locally adapted to their respective salinity conditions. Of the 198 (decreased salinity)  
215 and 148 (increased salinity) inducible pop-DMS, 130 (66%) and 101 (68%), respectively,  
216 changed to become more similar to methylation levels of the locally adapted field populations  
217 (hereafter ‘*expected*’ direction). Conversely, at 68 and 47 inducible pop-DMS experimental fish  
218 showed methylation changes in the opposite direction, decreasing the similarity with methylation  
219 levels observed in the natural populations from 6 and 33 PSU, respectively (hereafter ‘*opposite*’  
220 direction). At this point, it is tempting to assume that a DNA methylation change in the *expected*  
221 direction is adaptive, while a change in the *opposite* direction is maladaptive. However, since  
222 correlations exist between genetic variants and DNA methylation<sup>31, 32</sup>, and SNPs at CpG sites  
223 may interfere with methylation function<sup>33, 34</sup>, conclusive evidence requires additional genomic  
224 characterization.

225 We then hypothesized that *opposite* inducible pop-DMS are associated with higher  
226 genomic (DNA sequence-based) differentiation, while we anticipated the reverse at *expected*  
227 inducible pop-DMS. Accordingly, we re-sequenced whole genomes of the same wild caught  
228 individuals we used for RRBS and calculated the degree of genomic differentiation per inducible  
229 pop-DMS as mean  $F_{ST}$  value ( $\pm 5$  kb window) between populations. In line with our hypothesis,  
230 the populations from Kiel and Nynäshamn (decreased salinity) were genetically more

231 differentiated at *opposite* inducible pop-DMS than at *expected* sites ( $\delta$ .mean.F<sub>ST</sub> = -0.014,  $P$  =  
232 0.002; Figure 3A and 3B). A similar trend, yet not significant, was found between the populations  
233 from Kiel and Sylt (increased salinity:  $\delta$ .mean.F<sub>ST</sub> = -0.005,  $P$  = 0.153; Figure 3C and 3D). Here,  
234 the lack of significance may be due to increased mortality and hence selection under increased  
235 salinity<sup>17</sup>. Thus, at least under decreased salinity, when experimentally induced DNA methylation  
236 becomes more similar to the methylation in natural populations, this occurs in a genomic  
237 background with low genetic differentiation. On the other hand, when experimentally induced  
238 methylation differences to the low salinity population increase (Figure 3A and 3B), this occurs in  
239 a genomic background with higher genetic differentiation. This finding underlines the importance  
240 of the genomic background when interpreting DNA methylation patterns. We suggest that  
241 genomic information at these regions already mirrors past selection leading to DNA-based local  
242 adaptation, rendering epigenetic modifications less relevant<sup>5</sup>. Nevertheless, it remains to be  
243 tested what happens to all induced DNA methylation sites with selection over multiple  
244 generations.  
245

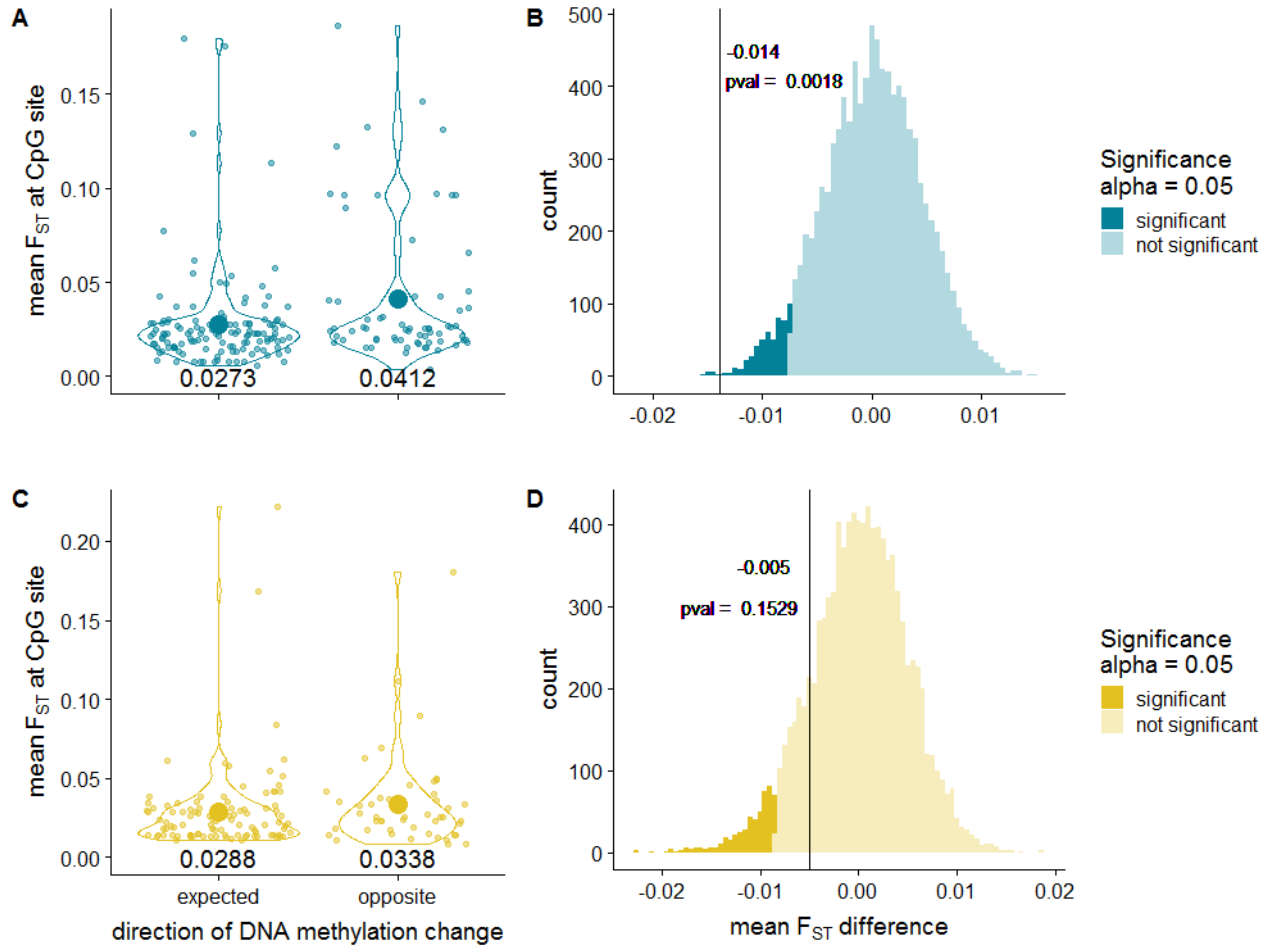

246  
247

248 **Figure 3: Differential DNA methylation between populations depends on the degree of genomic**  
249 **differentiation.**

250 Figure 3A and 3C show mean  $F_{ST}$  values for pop-DMS (with a  $\pm 5$  kb window) inducible under  
251 experimental salinity decrease (top, blue) and increase (bottom, yellow), that either shifted methylation  
252 levels towards the values observed in the field (*expected*) or the opposite direction (*opposite*). A  
253 randomization test (with 10,000 bootstraps) was performed for the difference between expected and  
254 opposite mean  $F_{ST}$  value ( $\delta \cdot \text{mean} \cdot F_{ST} = \text{'expected' mean } F_{ST} - \text{'opposite' mean } F_{ST}$ ; Figure 3B and 3D).  
255 Under the one tailed hypothesis of increased genetic differentiation at *opposite* sites and an alpha of 0.05  
256 the  $P$ -value was calculated as values smaller than the true difference divided by 10,000 bootstraps.

257

258 **Comparing within- and transgenerational acclimation effects on inducible DNA**  
259 **methylation**

260 We then tested whether or not transgenerational plasticity of DNA methylation is adaptive. Under  
261 this hypothesis, salinity acclimation over two consecutive generations compared to only within  
262 generation exposure would enhance the similarity at inducible pop-DMS with patterns found  
263 among wild populations at corresponding salinities. Hence, we calculated the percentage match  
264 ( $\delta$ .meth.diff, Figure 4) between the within- and transgenerational acclimation groups in relation  
265 to the anticipated adaptive methylation level at inducible pop-DMS. We found that  
266 transgenerational compared to only within generation salinity manipulation increased the  
267  $\delta$ .meth.diff (for 'expected' inducible methylation: decreased salinity:  $F_{1,256} = 30.42$ ,  $P < 0.001$ ;  
268 increased salinity:  $F_{1,198} = 10.39$ ,  $P = 0.001$ ; Figure 4A and C). Remarkably, we found an  
269 interaction of 'methylation direction' (hyper- or hypomethylation) and 'acclimation' (within- and  
270 transgenerational) affecting the  $\delta$ .meth.diff under decreased salinity (ANOVA,  $\delta$ .meth.diff ~  
271 methylation direction \* acclimation,  $F_{1,256} = 7.69$ ,  $P = 0.006$ ; Figure 4A). Here, transgenerational  
272 acclimation increased the similarity of hypomethylated sites to methylation levels found in natural  
273 populations, while hypermethylated sites showed equally similar values within- and across  
274 generations (Figure 4A). While for 'expected' inducible sites this effect was only present under  
275 decreased salinity, at 'opposite' inducible sites transgenerational acclimation to decreased and  
276 increased salinity enhanced the  $\delta$ .meth.diff at hypomethylated sites (Figure 4B and D; ANOVA,  
277  $\delta$ .meth.diff ~ methylation direction \* acclimation, decreased salinity:  $F_{1,132} = 19.89$ ,  $P < 0.001$ ;  
278 increased salinity:  $F_{1,90} = 9.85$ ,  $P = 0.002$ ). Generally, the spontaneous addition of a methyl-  
279 group to a cytosine is 2.5 times more likely than the removal<sup>35</sup> making a targeted de-methylation  
280 harder to achieve. In the transgenerational acclimation group, the methylation reprogramming  
281 including extensive methylation erasure and *de novo* methylation during gamete formation and  
282 zygote development could serve as a mechanistic basis to enhance de-methylation of CpG  
283 sites<sup>36, 37</sup>.

284

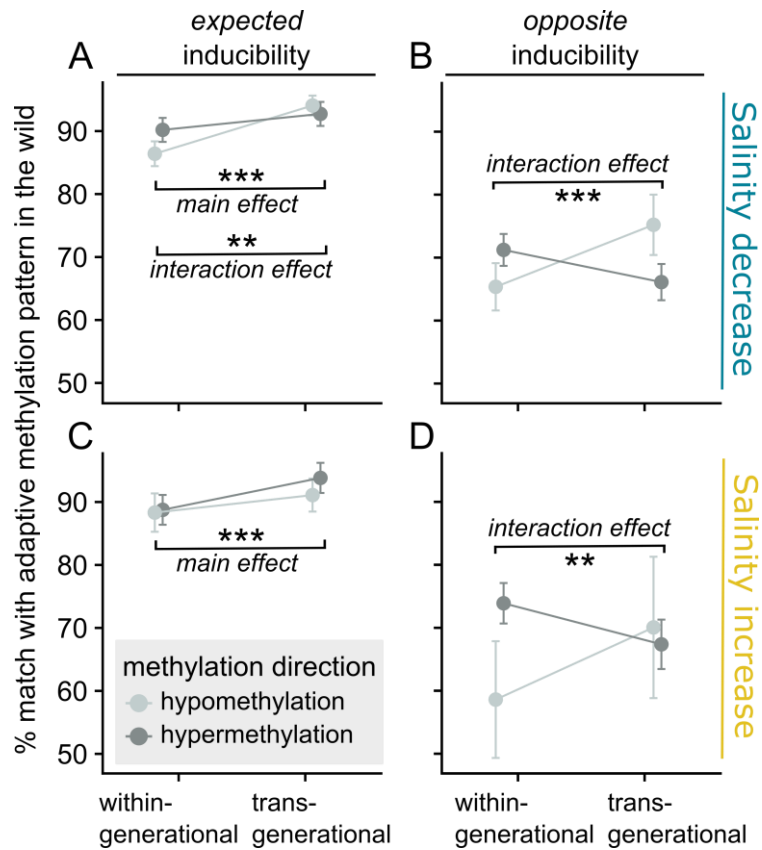

285

286

287 **Figure 4: Effect of the duration of acclimation (within- vs. transgenerational) on DNA methylation**

288 **inducibility.** The y-axis shows the percentage match between the within- and transgenerational

289 acclimation group in relation to the anticipated adaptive methylation level found in natural populations at

290 inducible pop-DMS. This value was obtained by calculating the difference between the methylation

291 change in the experiment (meth.diff.exp in %; control vs. within-generational or control vs.

292 transgenerational) and the difference in methylation between natural populations (meth.diff.wild in %) as

293  $\delta.\text{meth.diff} = 100 - (\text{meth.diff.wild} - \text{meth.diff.exp})$ . Mean values  $\pm$  95% confidence interval are shown for

294 within- and transgenerational acclimation to decreased and increased salinity at *expected* and *opposite*

295 inducible sites. Colors refer to the direction of DNA methylation change (hypomethylation or

296 hypermethylation). Values closer to 100 indicate a shift in methylation pattern towards adaptive

297 methylation levels found in natural populations and stars indicate the significance level ( $P \leq 0.001$  '\*\*\*';  $P \leq$

298 0.01 '\*\*') for the comparison between within- and transgenerational acclimation. 'Main effect' refers to an



299 effect of acclimation (within- or transgenerational) and '*interaction effect*' to an interaction of acclimation  
300 and methylation direction (hypo- or hypermethylation).

301

## 302 **Conclusion**

303 Our study provides the first empirical evidence that stable and inducible DNA methylation in  
304 nature exist and follow predictions from evolutionary theory according to a *selection-* and a  
305 *detection-based* epigenetic pathway to promote adaptation to novel environments<sup>5,7</sup> (Figure 5).  
306 Consistent with modeled selection dynamics of DNA methylation<sup>7</sup>, we identified DMS between  
307 populations enriched for critical osmoregulatory functions insensitive to experimental salinity  
308 change. Such *selection-based* (stable) methylation works along the same evolutionary trajectory  
309 as adaptive DNA sequence-based evolution<sup>5,7</sup>. Given expected epimutation rates of  
310 approximately  $10^{-4}$  (estimated for *A. thaliana*<sup>38</sup>), the resulting phenotypic variation allows  
311 populations to explore the fitness landscape faster than under DNA sequence based genetic  
312 variation alone<sup>5,35</sup>. On the other hand, other osmoregulatory functions corresponded to the  
313 *detection-based* epigenetic pathway<sup>7</sup> as they were associated with inducible DMS. This  
314 inducibility accumulated in the predicted direction across generations and forms a molecular  
315 basis of adaptive transgenerational plasticity. The latter has been widely discussed as potential  
316 buffer of environmental changes<sup>10,18,39</sup> which would allow populations to persist in the face of  
317 disturbance by moving phenotypes faster in the direction of optimal fitness than genetic changes  
318 alone<sup>5,35</sup>. By combining experiments on the inducibility of the methylation level of certain DMS  
319 with field observations on populations locally adapted to different salinity regimes<sup>15</sup>, we gained  
320 unprecedented insights into the role of DNA methylation patterns in natural populations. Overall,  
321 our study demonstrates that DNA methylation works alongside genetic evolution to facilitate  
322 local adaptation and promote adaptive transgenerational plasticity.

323

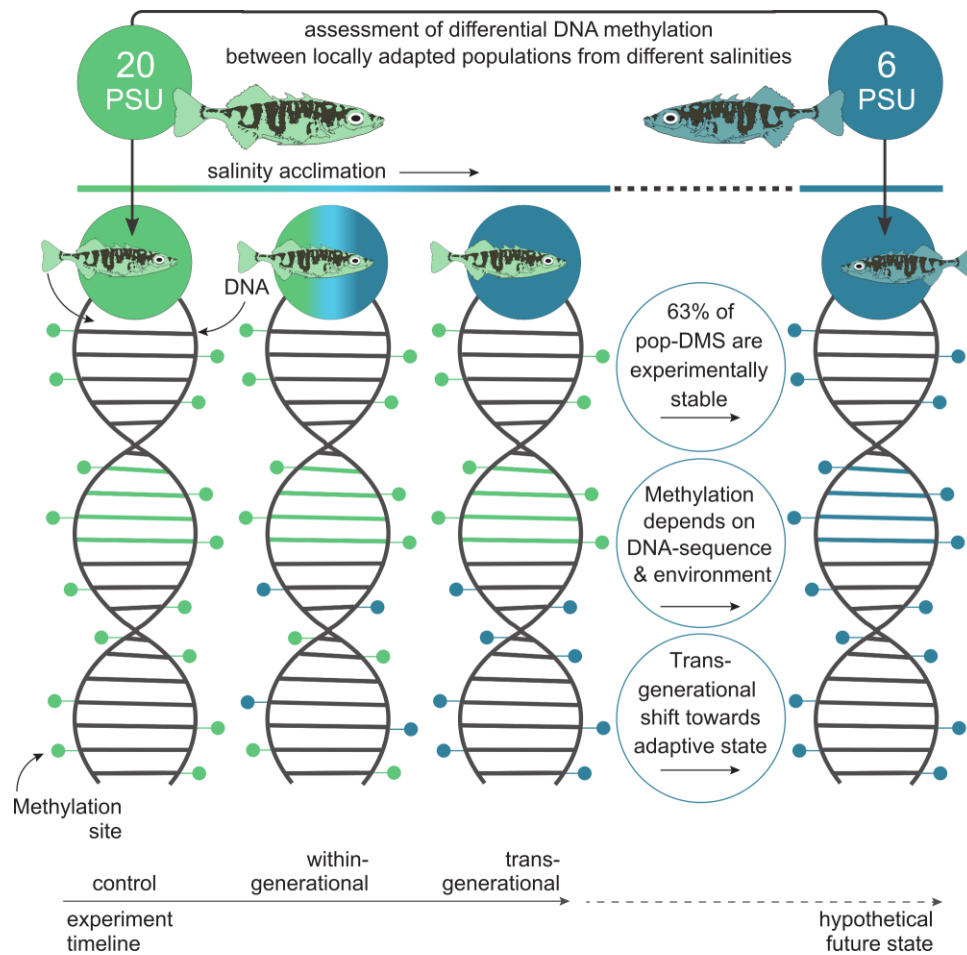

324

325 **Figure 5: Graphical summary of experimental design and main results.**

326 We used the Baltic Sea salinity gradient to study the role of DNA methylation in local salinity adaptation  
 327 and the response to salinity change in a space-for-time approach. To assess the potential future  
 328 acclimatization and adaptation processes of the natural stickleback population from 20 PSU (Kiel / green)  
 329 to the predicted desalination<sup>40</sup>, we compared differences in DNA methylation at CpG sites between wild  
 330 caught and laboratory bred sticklebacks. Following the experiment timeline (bottom), we compared  
 331 methylation levels of the experimental control group from 20 PSU, to within- and transgenerational  
 332 acclimation of 20 PSU sticklebacks to 6 PSU (DNA from left to right). The population locally adapted to 6  
 333 PSU serves as the hypothetical future state in which salinities will decrease (blue, DNA on the right). The  
 334 three main results are written in the circles with schematically and horizontally corresponding DNA  
 335 methylation changes. (i) 63% of the DMS between the populations remained stable under experimental  
 336 salinity change. (ii) The direction of experimental methylation change was dependent not only on the  
 337 treatment but also on the degree of genetic differentiation between the populations (see Figure 3 for

338 results). (iii) Transgenerational salinity acclimation shifted DNA methylation patterns closer to the  
339 anticipated adaptive state found in the hypothetical future population (see Figure 4 for results). For clarity,  
340 only one (6 PSU) of the two foreign salinity regimes tested (6 and 33 PSU) is shown, indicated by the  
341 yellow fish on the top left (see Figure 1 for full experimental design).

342

## 343 **Material and Methods**

### 344 **Animal Welfare**

345 All catches were performed under legal authorization issued by the German ‘Ministry of Energy  
346 Transition, Agriculture, Environment, Nature and Digitalization’ in Schleswig-Holstein (MELUR –  
347 V242-7224.121-19), by the Danish ‘Ministry of Food, Agriculture and Fisheries of Denmark’  
348 (Case no: 14-7410-000227), by the Estonian ‘Ministry of the Environment’  
349 (Keskkonnaministeerium - eripüügiluba nr 28/2014) and by the Swedish Sea and Water  
350 Authority (Havs och Vattenmyndigheten). Ethical permission for the experiments required by  
351 German law was given by the MELUR: V312-7224.121-19).

352

### 353 **Survey and experimental design**

354 For the field survey, we collected juvenile three-spined sticklebacks (*Gasterosteus aculeatus*;  
355  $31.68 \pm 14.25$  mm) from three different salinity regimes inside and outside the Baltic Sea (Sylt  
356 (SYL), Germany (55°00'58.3"N, 8°26'22.0"E), 33 PSU, N = 16; Kiel (KIE), Germany  
357 (54°26'11.8"N 10°10'20.2"E), 20 PSU, N = 16; Nynäshamn (NYN), Sweden (58°52'44.7"N  
358 17°56'06.2"E), 6PSU, N = 16) in September 2014. Once collected, fish were immediately  
359 euthanized using tricaine methane sulfonate solution (MS222), photographed, measured (length  
360 and total weight) and stored in RNA-later (24h at 7°C, afterwards at -20°C). A cut along the  
361 ventral side ensured that the RNA-later solution would diffuse into all tissues. Conserved  
362 specimen were later dissected in the lab and gill tissue was separated. For the acclimation  
363 experiment, we collected live adult fish from Kiel (20 PSU), which were crossed in our facilities at

364 GEOMAR to obtain ten F1 laboratory bred families, herein referred to as '*parental generation*'. At  
365 nine months post-hatch we split each family into three salinity treatment groups of 10 fish each:  
366 one at 33 PSU, one at 6 PSU, and one control group at 20 PSU. The salinity transition was  
367 performed within 10 days by 3 PSU steps every second day. Over the entire time each group  
368 was fed *ad libitum* and kept in a 20-L aquarium connected to one of three filter tanks per salinity  
369 treatment. After 5 months under treatment conditions, six pure crosses per salinity treatment  
370 group were performed *in vitro*, herein referred to as '*offspring generation*' (F2). Upon fertilization,  
371 clutches were split and separated into different treatments (Figure 1). At three months post-  
372 hatch, laboratory bred F2 sticklebacks were euthanized using MS222, photographed, dissected  
373 and their gill tissue was stored in RNA-later. The age at sampling matched the estimated age of  
374 the wild caught juveniles. Additionally, to the 48 wild caught individuals from Kiel, Nynäshamn  
375 and Sylt that were used in above field survey, we sequenced whole genomes from gill tissue of  
376 an additional three populations of sticklebacks, namely from Falsterbo, Sweden (55°24'46.6"N  
377 12°55'52.3"E; 10 PSU; N = 16), Letipea (59°33'07.6"N 26°36'29.7"E; 4 PSU; N = 16) and Barsta  
378 (62°51'47.1"N 18°23'51.0"E; 5 PSU; N = 16).

379

### 380 **DNA extraction**

381 For the field survey, DNA extraction of gill tissue (N = 16 individuals per population) was  
382 performed using the DNeasy Blood & Tissue Kit (Qiagen). Further purification of the extracted  
383 DNA was done with NucleoSpin® gDNA Clean-up (Macherey-Nagel). For laboratory bred F2  
384 offspring of the two-generation acclimation experiment, dual extraction of whole RNA and DNA  
385 was performed from gill tissue (N = 11-12 individuals per treatment group, Figure 1) stored in  
386 RNAlater using the AllPrep DNA/RNA mini kit (Qiagen). Purity and quality of the extracted DNA  
387 was estimated using a NanoDrop ND-1000 spectrophotometer (Thermo Fisher Scientific) and a  
388 standard agarose gel (1% Agarose/TAE). DNA concentration was assessed using the Qubit®  
389 2.0 Fluorometer (Thermo Fisher Scientific). To obtain a balanced sex ratio, we determined the

390 gender of the individuals using a sex-specific genetic polymorphism in isocitrate dehydrogenase  
391 (IDH) with a modified protocol from Peichel *et al.* (2004)<sup>41</sup>. For the PCR (settings: once 94°C for  
392 3 minutes; 30 cycles of 94°C for 30 sec, 54°C for 20 sec, 72°C for 30 sec; once 72°C for 5  
393 minutes), 1 µL forward and reverse primer (5µM) was used with 4.9 µL water, 1 µL 10x buffer, 1  
394 µL dNTPs (0.5 µM), and 0.1 µL DreamTaq (5 U/µL). The resulting PCR products were visualized  
395 with a capillary electrophoresis on the 3100 ABI sequencer and a LIZ500 size standard. While  
396 males show a heterogametic signal with two bands (at approximately 300 bp and 270 bp),  
397 females lack the band at 270 bp.

398

### 399 **Library preparation and sequencing (Whole genome sequencing, WGS)**

400 For whole genome sequencing, the 'TruSeq Nano DNA' (Illumina) library preparation kit was  
401 used according to the manufacturer's protocol by the Sequencing Facility of the IKMB, University  
402 of Kiel. Ultrasonication was conducted with a 'Covaris E220' (Covaris) to shear the input DNA  
403 (100 ng per sample and 350 bp insert size). Before the enrichment with a PCR step (8 cycles),  
404 fragmented and bead purified DNA was ligated with adenylate at the blunt 3' ends (End repair  
405 and A-tailing) and with indexing adapters. Fragments were cleaned with MagSi-NGS Prep Plus  
406 Beads (Steinbrenner). Paired-end sequencing of the quality-controlled and multiplexed libraries  
407 was performed on the Illumina Hiseq 4000 platform (2 x 150 bp reads).

408

### 409 **Quality assessment, data filtering and mapping (WGS)**

410 The command line tools of *Picard v.2.7.1* (Broad Institute 2016) were used to (i) reformat the  
411 Fastq to uBAM file format and to add further values (read group etc.) to the SAM header using  
412 *FastqToSam*), to (ii) mark the location of adapter sequences using *MarkIlluminaAdapters*, and to  
413 (iii) reconvert the sequences to Fastq format with *SamToFastq*. The stickleback genome (here  
414 Broad/gasAcu1) was indexed with *bwa index* and used as a reference for the mapping with *bwa*

415 *mem*<sup>42</sup> v.07.12-r1044. To retain the meta-information from the uBAMs we used  
416 *MergeBamAlignment*. *Picard* was also used to identify duplicates with *MarkDuplicates*. Basic  
417 statistics were generated with *CollectWgsMetrics*, *CollectInsertSizeMetrics* and  
418 *AlignmentSummaryMetrics* and summarized with *MultiQC v1.0.dev0*<sup>43</sup>. A total number of  
419 4,463,070,154 high-quality reads (mapping quality > Q20) was mapped resulting in a mean  
420 depth of 13.84x (sd. 2.02x) and mean insert size 383.07 bp (sd. 9.40 bp, Supplementary Table  
421 S3). *GATK v 3.7 HaplotypeCaller*<sup>44</sup> was run to determine the likelihoods of the haplotypes per  
422 sample, i.e. to call SNPs and indels, which were then processed with *GenotypeGVCFs* for a joint  
423 genotyping. SNPs were selected using hard filters for quality and extracted from the raw  
424 genotypes with a combination of the *SelectVariants*, *VariantsToTable* and *VariantFiltration*  
425 commands. *VCFtools*<sup>45</sup> was used in a next step, removing SNPs with a minimum quality score  
426 (*minQ*) below 20 and a minor allele frequency (*maf*) greater than or equal 0.0049.

#### 427 428 **Library preparation and sequencing (reduced representation bisulfite sequencing, RRBS)**

429 The library preparation for methylation analyses followed the Smallwood and Kelsey reduced  
430 representation bisulfite sequencing (RRBS) protocol<sup>46</sup>. A total of 100-250 ng purified DNA was  
431 digested with the methylation-insensitive *MspI* restriction enzyme, which cuts at the “CCGG”  
432 motif and thereby enriches for CpG regions. DNA end-repair and A-tailing was conducted and  
433 un-tailed CEGX spike-in controls (Cambridge Epigenetix) were added. These are DNA oligos of  
434 known sequence and with known cytosine modification, which can be used for downstream  
435 assessment of bisulfite conversion efficiency. After adapter ligation, bisulfite conversion was  
436 conducted using the EZ-96 DNA Methylation-Gold Kit (Zymo Research) according to the  
437 manufacturer’s protocol. PCR amplification with 19 cycles were performed. Quality control of  
438 purified PCR products was performed on a 2200 TapeStation System (Agilent) and high-quality  
439 libraries were pooled and diversified with 15% PhiX. Single-end sequencing with 100 bp read  
440 length was conducted on a HiSeq 2500 sequencer (Illumina).

441

## 442 **Quality assessment, data filtering and mapping (RRBS)**

443 In total 106 individuals (48 wild caught and 58 experimental fish) of balanced sex ratio were  
444 DNA sequenced at an average of  $19.8 \pm 3.5$  million reads for experimental fish and  $11.4 \pm 2.1$   
445 million reads for wild-caught fish (Supplementary Table S4). De-multiplexed fastq files were  
446 quality checked using *FastQC v0.11.5*<sup>47</sup> and *Multiqc v1.3*<sup>43</sup>. Adapters were removed with  
447 *cutadapt v1.9.1*<sup>48</sup> using multiple adapter sequences (NNAGATCGGAAGAGCACAC,  
448 AGATCGGAAGAGCACAC, ATCGGAAGAGCACAC) with a minimum overlap of one base pair  
449 between adapter and read. This was necessary to remove primer dimers and avoid false  
450 methylation calls systematically caused by the RRBS end-repair step during library preparation,  
451 if the end repair step adds artificial cytosins. Simultaneously, *cutadapt* was used to trim low  
452 quality bases ( $-q 20$ ) from the 3'-end and remove trimmed reads shorter than 10 bases. An air  
453 bubble during sequencing caused the bases 66-72 of ten tiles of one lane (affecting 12  
454 individuals) to have low quality values, which were removed in a custom *awk* script. Two poor  
455 quality individuals (a Sylt and a Nynäshamn female) did not meet our strict quality requirements  
456 (e.g.:  $\geq 5$  million reads, mapping efficiency  $> 52\%$ ) and showed biases in the proportion of  
457 bases per position compared to other individuals (plot in fastqc "per base sequence content").  
458 Therefore, we excluded these two libraries from downstream analysis resulting in 15 instead of  
459 16 individuals from Sylt and Nynäshamn (Figure 1). Bisulfite conversion efficiency was assessed  
460 from the spike-in controls (Cambridge Epigenetix), using the *cegQC software*<sup>49</sup>. Overall  
461 conversion levels were  $2.4 \pm 1.8\%$  conversion of methylated cytosines and  $99.6 \pm 0.5\%$   
462 conversion of un-methylated cytosines, which is in line with expected conversion rates  
463 (Supplementary Table S4). We used *Bismark v0.17.0*<sup>50</sup> to index the UCSC stickleback reference  
464 genome (Broad/gasAcu1) and to generate the bisulfite alignments with *Bowtie2 v2.3.3* at default  
465 settings. *Bismark* was also used to extract the methylation calls. Average mapping efficiency  
466 was  $63.7 \pm 2.4\%$  (Supplementary Table S4).

467

## 468 **Identification of differentially methylated sites**

469 The methylation calls were analyzed in *R* v3.4.<sup>151</sup> using the package *methyKit* v1.3.8<sup>52</sup>. CpG  
470 loci were filtered for a minimum coverage of 10 reads per site. To account for potential PCR  
471 bias, we additionally excluded all sites in the 99.9<sup>th</sup> percentile of coverage. To improve the  
472 methylation estimates, we corrected for SNPs, which could have led to a wrong methylation call.  
473 The excluded positions were derived with custom written perl scripts from C-to-T and G-to-A-  
474 SNPs with genotype quality of 20 and a minimum allele frequency of 0.005 (see above) from the  
475 96 wild caught individuals with a combination of custom written Perl and R-scripts using  
476 packages from *methykit*<sup>52</sup> and *GenomicRanges*<sup>53</sup> (Supplementary File Summary\_scripts.txt).  
477 After normalizing coverage values between samples, using *normalizeCoverage* implemented in  
478 *methyKit*, we excluded all sites that were present in fewer than 9 individuals per treatment group  
479 from downstream analysis. As previously shown, sex specific methylation affects < 0.1% of CpG  
480 sites on autosomal chromosomes, but > 5% of CpGs on the sex chromosome<sup>19</sup>. Therefore, to  
481 exclude a potential sex bias, we removed all CpG sites located on the sex chromosomes  
482 (chromosome 19), resulting in a high-quality dataset with 525,985 CpG sites. Finally, by  
483 checking the first six principal components of the resulting PCA and running an ANOVA on the  
484 filtered dataset, we confirmed the absence of an effect of sex on global methylation pattern  
485 ( $F_{124,1} = 2.611$ ,  $P = 0.109$ ). However, the PCA revealed a bias in methylation pattern by families  
486 over all experimental groups. Therefore, to identify differentially methylated CpG sites (DMS)  
487 between treatment groups, we performed pairwise comparisons (Supplementary Table S5)  
488 fitting a logistic regression model per CpG site with *calculateDiffMeth* in *methyKit* using family as  
489 covariate for the experimental groups. A Chi-square test was applied to assess significance  
490 levels of DMS and *P*-values were corrected to *q*-values for multiple testing using the SLIM  
491 (sliding linear model) method<sup>54</sup>. Additionally, we accounted for multiple use of groups in pairwise  
492 comparisons and adjusted the alpha for the *q*-value according to Bonferroni correction to 0.0125



493 (= 0.05 / 4). Ultimately, CpG sites were considered to be differentially methylated with a  $q$ -value  
494 < 0.0125 and a minimum weighted mean methylation difference of 15%. To ensure that the DMS  
495 obtained are not laboratory artefacts, we used *calculateDiffMeth* implemented in *methylKit*  
496 compared the wild population from Kiel to the experimental control group (Kiel population from  
497 20 PSU at 20 PSU). The resulting 11,828 DMS were excluded from the DMS obtained by the  
498 pairwise comparisons mentioned above (Supplementary Table S5). DMS were plotted across  
499 the genome for the comparison between Kiel vs Nynäshamn (20 vs. 6 PSU, blue fish) and Kiel  
500 vs Sylt (20 vs. 33 PSU, yellow fish) using *ggplot2*<sup>55</sup> und *hypoim*<sup>56</sup> (Supplementary Figure S3).

501

## 502 **Assessment of inducibility and gene association of DMS**

503 By comparing wild caught individuals from the mid salinity population (KIE, 20 PSU) to the  
504 populations sampled at low (6 PSU, NYN) and high (33 PSU, SYL) salinity in the field, we  
505 obtained 1,470 (KIE-NYN) and 1,158 (KIE-SYL) pairwise pop-DMS, which are hypothetically  
506 involved in local adaptation. We first tested whether these pop-DMS distinguishing natural  
507 populations are inducible or stable at the respective salinity in the experiment. A pop-DMS was  
508 considered stable when the within- and the transgenerational acclimation group did not  
509 significantly differ in methylation to the control group ( $q$ -value  $\geq 0.0125$ ). On the other hand, pop-  
510 DMS were considered inducible when at least one of the acclimation groups was differentially  
511 methylated compared to the control group ( $q$ -value < 0.0125; methylation difference  $\geq 15\%$ ).  
512 Pop-DMS with a significant  $q$ -value not exceeding the threshold of differential DNA methylation  
513 (15%) will be referred to as ‘*semi-inducible*’ hereafter. We used a randomization test to ensure  
514 that the number of inducible sites obtained did not occur by chance. To this end, we randomly  
515 sampled 1,470 (KIE-NYN) and 1,158 (KIE-SYL) pop-DMS from the complete dataset (1,000  
516 replicates). A Chi-square test was used to assess whether our observed number of inducible,  
517 stable and semi-inducible sites differs from a random set of sites (averaged over replicates).  
518 Finally, we tested whether the weighted mean methylation difference (meth.diff, in percentage)

519 between wild populations matches the inducible methylation difference by subtracting the  
520 'meth.diff' in the experiment (exp) from the 'meth.diff' between wild caught populations (wild):

$$521 \quad \delta.\text{meth.diff} = 100 - (\text{meth.diff.wild} - \text{meth.diff.exp})$$

522 As we subtracted this difference from 100, values closer to 100 indicated higher similarity of  
523 experimentally inducible methylation with the postulated adaptive DNA methylation pattern in  
524 natural populations. By comparing the ' $\delta$ .meth.diff' for within- and transgenerational acclimation  
525 using an ANOVA, we can assess whether there is a difference in inducibility of methylation to  
526 match patterns found in wild caught populations. All analyses were run separately for decreased  
527 (6 PSU; KIE-NYN) and increased (33 PSU; KIE-SYL) salinity.

528 In order to detect potential functional associations of the observed changes in DNA  
529 methylation state, we classified the genomic region of a pop-DMS based on their nearest  
530 transcription start site (TSS) using *annotateWithGeneParts* and *getAssociationWithTSS*  
531 implemented in *genomation v1.4.2*<sup>57</sup>. We distinguished between promoter (1500 bp upstream  
532 and 500 bp downstream of TSS), exon, intron and intergenic regions. To be associated to a  
533 gene, the pop-DMS had to be either inside the gene or, if intergenic, not further than 10 kb away  
534 from the TSS. We excluded three pop-DMS that were on a different reference scaffold than the  
535 gene they were associated to on the chrUn linkage group (that merges scaffolds into one large  
536 artificial chromosome). Using the genes with associated pop-DMS, we applied a conditional  
537 hypergeometric GO term enrichment analysis ( $P$ -value  $\leq 0.05$ ) with the ensembl stickleback  
538 annotation dataset '*gaculeatus\_gene\_ensembl*' and all genes that were associated to any  
539 sequenced CpG site as universe. We identified overrepresented biological processes, molecular  
540 functions and cellular components using the package *GOstats v2.46*<sup>58</sup> in *R v3.4.1*<sup>51</sup>. Figures  
541 were produced using *ggplot2*<sup>55</sup>.

542

543 **Estimation of DNA sequence based genetic differentiation at differentially methylated sites**

544 In order to evaluate the genetic differentiation up- and downstream (in sum 10 kb) of the pop-  
545 DMS position, we calculated the mean  $F_{ST}$  values ( $\leq 40\%$  missing data and depth  $\geq 5$ ) from  
546 whole genome sequencing data of the exact same individuals with *vcftools v.0.1.15*<sup>59</sup>. We  
547 hypothesized that inducible CpG positions matching the methylation difference *expected* from  
548 the profile of the wild populations are genetically more similar between the populations than sites  
549 that changed in the *opposite* direction. To test this one-tailed hypothesis we applied a  
550 randomization test (with 10,000 bootstraps) on the mean  $F_{ST}$  difference between the two groups  
551 (expected and opposite):

$$552 \quad \delta.\text{mean}.F_{ST} = \text{'expected' mean } F_{ST} - \text{'opposite' mean } F_{ST}$$

553 We plotted the 10,000 delta mean  $F_{ST}$  values and calculated a *P*-value by dividing the proportion  
554 of values smaller than the true difference by the number of bootstraps. Figures were produced  
555 using *ggplot2*<sup>55</sup>.

556

## 557 **Author contributions**

558 CE and TBHR conceived and designed the study with contributions for the bisulfite sequencing  
559 strategy from BSM. BSM and MJH planned and carried out the fieldwork at the German  
560 locations, BSM supervised the sampling in Estonia and Sweden, which was carried out by a  
561 great team of the BONUS-BAMBI project. MJH, with the help from CE and TBHR, planned and  
562 supervised the breeding and acclimatization experiment. MJH and BSM conducted wet  
563 laboratory work (DNA extractions and quality assessment). MPH and RH and conducted the  
564 library preparation and sequencing. MJH and BSM analyzed the data and drafted the  
565 manuscript together with equal contributions. All co-authors discussed and interpreted the  
566 results and contributed to the final version of the manuscript.

567

## 568 **Data Availability**

569 Fastq raw reads of genomes and methylation sequencing will be deposited in GenBank.

570

## 571 **Code Availability**

572 Custom code is available as supplementary information (Summary\_scripts.txt).

573

## 574 **Acknowledgments**

575 Many thanks to Fabian Wendt, Jakob Gismann, Linda Sartoris, Christoph Giez, Zuzanna  
576 Zagrodzka, Laura Niewendick, Max Bettendorff, Bastian Poerschke, and Tobias Strickmann for  
577 taking care of the experimental animals and assisting the sampling procedures. Thanks to  
578 Florian R uppel for planning and constructing the recirculating aquaria systems. We thank the  
579 many field helpers for catching wild sticklebacks. Many thanks also to Susanne Landis who  
580 visualized our ideas in Figure 1 and 5. We kindly acknowledge the financial support for the  
581 BAMBI project (Grant Agreement number: call 2012-76) by BONUS, the joint Baltic Sea  
582 research program, funded by the European Union and the Federal Ministry of Education and  
583 Research in Germany to TBHR and CE (reference number 03F0680A). Further, BSM's research  
584 was generously supported by the Excellence Cluster 'The Future Ocean' (EXC 80) and the  
585 sequencing partly by the Excellence Cluster 'Inflammation at Interfaces' (EXC 306) and 'Origins  
586 and Function of Metaorganisms' (CRC1182), subprojects Z3 & INF, by the Deutsche  
587 Forschungsgemeinschaft (DFG). Both 'The Future Ocean' and 'Inflammation at Interfaces' are  
588 funded within the framework of the Excellence Initiative by the Deutsche  
589 Forschungsgemeinschaft (DFG) on behalf of the German federal and state governments.

590

## 591 **Competing interests**

592 The authors declare no competing interests.

593

## 594 **Supplementary Information**

595 Methodological details, scripts, supplementary results, figures and tables are provided.

596

## 597 **References**

- 598 1. Jablonka E. The evolutionary implications of epigenetic inheritance. *Interface focus*  
599 2017, **7**(5): 20160135.  
600
- 601 2. Laland KN, Uller T, Feldman MW, Sterelny K, Müller GB, Moczek A, *et al.* Does  
602 evolutionary theory need a rethink? *Nature News* 2014, **514**(7521): 161.  
603
- 604 3. Lind MI, Spagopoulou F. Evolutionary consequences of epigenetic inheritance.  
605 *Heredity* 2018, **121**: 205-209.  
606
- 607 4. Bossdorf O, Richards CL, Pigliucci M. Epigenetics for ecologists. *Ecology Letters*  
608 2008, **11**(2): 106-115.  
609
- 610 5. Klironomos FD, Berg J, Collins S. How epigenetic mutations can affect genetic  
611 evolution: model and mechanism. *Bioessays* 2013, **35**(6): 571-578.  
612
- 613 6. Jones PA. Functions of DNA methylation: islands, start sites, gene bodies and  
614 beyond. *Nature Reviews Genetics* 2012, **13**(7): 484.  
615
- 616 7. Shea N, Pen I, Uller T. Three epigenetic information channels and their different  
617 roles in evolution. *Journal of Evolutionary Biology* 2011, **24**(6): 1178-1187.  
618
- 619 8. Kronholm I, Collins S. Epigenetic mutations can both help and hinder adaptive  
620 evolution. *Molecular Ecology* 2016, **25**(8): 1856-1868.  
621
- 622 9. Johannes F, Porcher E, Teixeira FK, Saliba-Colombani V, Simon M, Agier N, *et al.*  
623 Assessing the impact of transgenerational epigenetic variation on complex traits.  
624 *PLoS Genetics* 2009, **5**(6): e1000530.  
625
- 626 10. Ryu T, Veilleux HD, Donelson JM, Munday PL, Ravasi T. The epigenetic landscape  
627 of transgenerational acclimation to ocean warming. *Nature Climate Change* 2018,  
628 **8**(6): 504-509.  
629
- 630 11. Kronholm I, Bassett A, Baulcombe D, Collins S. Epigenetic and Genetic  
631 Contributions to Adaptation in chlamydomonas. *Molecular Biology and Evolution*  
632 2017, **34**(9): 2285-2306.  
633
- 634 12. Hu J, Barrett R. Epigenetics in natural animal populations. *Journal of Evolutionary*  
635 *Biology* 2017, **30**(9): 1612-1632.  
636
- 637 13. Evans DH. Cell signaling and ion transport across the fish gill epithelium. *Journal*  
638 *of Experimental Zoology* 2002, **293**(3): 336-347.

- 639  
640 14. Reusch TBH, Dierking J, Andersson HC, Bonsdorff E, Carstensen J, Casini M, *et*  
641 *al.* The Baltic Sea as a time machine for the future coastal ocean. *Science*  
642 *Advances* 2018, **4**(5): eaar8195.  
643
- 644 15. Guo B, DeFaveri J, Sotelo G, Nair A, Merilä J. Population genomic evidence for  
645 adaptive differentiation in Baltic Sea three-spined sticklebacks. *BMC Biology* 2015,  
646 **13**(1): 19.  
647
- 648 16. DeFaveri J, Merilä J. Local adaptation to salinity in the three-spined stickleback?  
649 *Journal of Evolutionary Biology* 2014, **27**(2): 290-302.  
650
- 651 17. Heckwolf MJ, Meyer BS, Döring T, Eizaguirre C, Reusch TBH. Transgenerational  
652 plasticity and selection shape the adaptive potential of sticklebacks to salinity  
653 change. *Evolutionary Applications* 2018, **11**(10): 1873-1885.  
654
- 655 18. Shama LNS, Mark FC, Strobel A, Lokmer A, John U, Wegner KM.  
656 Transgenerational effects persist down the maternal line in marine sticklebacks:  
657 gene expression matches physiology in a warming ocean. *Evolutionary*  
658 *applications* 2016, **9**(9): 1096-1111.  
659
- 660 19. Metzger DCH, Schulte PM. The DNA Methylation Landscape of Stickleback  
661 Reveals Patterns of Sex Chromosome Evolution and Effects of Environmental  
662 Salinity. *Genome Biol Evol* 2018, **10**(3): 775-785.  
663
- 664 20. Artemov AV, Mugue NS, Rastorguev SM, Zhenilo S, Mazur AM, Tsygankova SV,  
665 *et al.* Genome-wide DNA methylation profiling reveals epigenetic adaptation of  
666 stickleback to marine and freshwater conditions. *Molecular biology and evolution*  
667 2017, **34**(9): 2203-2213.  
668
- 669 21. Bird A. Perceptions of epigenetics. *Nature* 2007, **447**(7143): 396.  
670
- 671 22. Fraser HB. Gene expression drives local adaptation in humans. *Genome Research*  
672 2013, **23**(7): 1089-1096.  
673
- 674 23. Lenz TL, Eizaguirre C, Rotter B, Kalbe M, Milinski M. Exploring local immunological  
675 adaptation of two stickleback ecotypes by experimental infection and  
676 transcriptome-wide digital gene expression analysis. *Molecular Ecology* 2013,  
677 **22**(3): 774-786.  
678
- 679 24. Colosimo PF, Hosemann KE, Balabhadra S, Villarreal G, Jr., Dickson M, Grimwood  
680 J, *et al.* Widespread parallel evolution in sticklebacks by repeated fixation of  
681 Ectodysplasin alleles. *Science* 2005, **307**(5717): 1928-1933.  
682
- 683 25. Spence R, Wootton RJ, Przybylski M, Zięba G, Macdonald K, Smith C. Calcium  
684 and salinity as selective factors in plate morph evolution of the three-spined

- 685 stickleback (*Gasterosteus aculeatus*). *Journal of Evolutionary Biology* 2012,  
686 **25**(10): 1965-1974.
- 687
- 688 26. Paccard A, Wasserman BA, Hanson D, Astorg L, Durston D, Kurland S, *et al.*  
689 Adaptation in temporally variable environments: stickleback armor in periodically  
690 breaching bar-built estuaries. *Journal of evolutionary biology* 2018, **31**(5): 735-752.  
691
- 692 27. Ferchaud AL, Pedersen SH, Bekkevold D, Jian J, Niu Y, Hansen MM. A low-density  
693 SNP array for analyzing differential selection in freshwater and marine populations  
694 of threespine stickleback (*Gasterosteus aculeatus*). *BMC Genomics* 2014, **15**(1):  
695 867.  
696
- 697 28. Hohenlohe PA, Bassham S, Etter PD, Stiffler N, Johnson EA, Cresko WA.  
698 Population genomics of parallel adaptation in threespine stickleback using  
699 sequenced RAD tags. *PLoS Genetics* 2010, **6**(2): e1000862.  
700
- 701 29. Terekhanova NV, Logacheva MD, Penin AA, Neretina TV, Barmintseva AE,  
702 Bazykin GA, *et al.* Fast evolution from precast bricks: genomics of young  
703 freshwater populations of threespine stickleback *Gasterosteus aculeatus*. *PLoS*  
704 *Genetics* 2014, **10**(10): e1004696.  
705
- 706 30. DeFaveri J, Jonsson PR, Merilä J. Heterogeneous genomic differentiation in  
707 marine threespine sticklebacks: adaptation along an environmental gradient.  
708 *Evolution* 2013, **67**(9): 2530-2546.  
709
- 710 31. Gibbs JR, van der Brug MP, Hernandez DG, Traynor BJ, Nalls MA, Lai SL, *et al.*  
711 Abundant quantitative trait loci exist for DNA methylation and gene expression in  
712 human brain. *PLoS Genetics* 2010, **6**(5): e1000952.  
713
- 714 32. Shoemaker R, Deng J, Wang W, Zhang K. Allele-specific methylation is prevalent  
715 and is contributed by CpG-SNPs in the human genome. *Genome Research* 2010,  
716 **20**: 883–889.  
717
- 718 33. Gertz J, Varley KE, Reddy TE, Bowling KM, Pauli F, Parker SL, *et al.* Analysis of  
719 DNA methylation in a three-generation family reveals widespread genetic influence  
720 on epigenetic regulation. *PLoS Genetics* 2011, **7**(8): e1002228.  
721
- 722 34. Hellman A, Chess A. Extensive sequence-influenced DNA methylation  
723 polymorphism in the human genome. *Epigenetics & Chromatin* 2010, **3**(1): 11.  
724
- 725 35. Van Der Graaf A, Wardenaar R, Neumann DA, Taudt A, Shaw RG, Jansen RC, *et*  
726 *al.* Rate, spectrum, and evolutionary dynamics of spontaneous epimutations.  
727 *Proceedings of the National Academy of Sciences* 2015, **112**(21): 6676-6681.  
728
- 729 36. Potok ME, Nix DA, Parnell TJ, Cairns BR. Reprogramming the maternal zebrafish  
730 genome after fertilization to match the paternal methylation pattern. *Cell* 2013,  
731 **153**(4): 759-772.

- 732  
733 37. Labbé C, Robles V, Herraes MP. Epigenetics in fish gametes and early embryo.  
734 *Aquaculture* 2017, **472**: 93-106.  
735  
736 38. Schmitz RJ, Schultz MD, Lewsey MG, O'Malley RC, Urich MA, Libiger O, *et al.*  
737 Transgenerational epigenetic instability is a source of novel methylation variants.  
738 *Science* 2011, **334**(6054): 369-373.  
739  
740 39. Torda G, Donelson JM, Aranda M, Barshis DJ, Bay L, Berumen ML, *et al.* Rapid  
741 adaptive responses to climate change in corals. *Nature Climate Change* 2017, **7**:  
742 627–636.  
743  
744 40. Meier HEM. Baltic Sea climate in the late twenty-first century: a dynamical  
745 downscaling approach using two global models and two emission scenarios. *Clim*  
746 *Dynam* 2006, **27**(1): 39-68.  
747  
748 41. Peichel CL, Ross JA, Matson CK, Dickson M, Grimwood J, Schmutz J, *et al.* The  
749 master sex-determination locus in threespine sticklebacks is on a nascent Y  
750 chromosome. *Current biology* 2004, **14**(16): 1416-1424.  
751  
752 42. Li H, Durbin R. Fast and accurate short read alignment with Burrows–Wheeler  
753 transform. *Bioinformatics* 2009, **25**(14): 1754-1760.  
754  
755 43. Ewels P, Magnusson M, Lundin S, Käller M. MultiQC: summarize analysis results  
756 for multiple tools and samples in a single report. *Bioinformatics* 2016, **32**(19): 3047-  
757 3048.  
758  
759 44. McKenna A, Hanna M, Banks E, Sivachenko A, Cibulskis K, Kernysky A, *et al.* The  
760 Genome Analysis Toolkit: a MapReduce framework for analyzing next-generation  
761 DNA sequencing data. *Genome Research* 2010.  
762  
763 45. Danecek P, Auton A, Abecasis G, Albers CA, Banks E, DePristo MA, *et al.* The  
764 variant call format and VCFtools. *Bioinformatics* 2011, **27**(15): 2156-2158.  
765  
766 46. Smallwood SA, Kelsey G. Genome-Wide Analysis of DNA Methylation in Low Cell  
767 Numbers by Reduced Representation Bisulfite Sequencing. In: Engel N (ed).  
768 *Genomic Imprinting: Methods and Protocols*. Humana Press: Totowa, NJ, 2012,  
769 pp 187-197.  
770  
771 47. Andrews S. FastQC: a quality control tool for high throughput sequence data.  
772 (<http://www.bioinformatics.babraham.ac.uk/projects/fastqc>). 2010.  
773  
774 48. Martin M. Cutadapt removes adapter sequences from high-throughput sequencing  
775 reads. *EMBnet Journal* 2011, **17**(1): 10-12.  
776  
777 49. CEGX Bioinformatics Team. Cambridge Epigenetix (CEGX), Babraham Research  
778 Campus, Cambridge. 2015.



- 779  
780 50. Krueger F, Andrews SR. Bismark: a flexible aligner and methylation caller for  
781 Bisulfite-Seq applications. *Bioinformatics* 2011, **27**(11): 1571-1572.  
782  
783 51. R Core Team. R: A language and environment for statistical computing. *R*  
784 *Foundation for Statistical Computing, Vienna, Austria* 2017.  
785  
786 52. Akalin A, Kormaksson M, Li S, Garrett-Bakelman FE, Figueroa ME, Melnick A, *et*  
787 *al.* methylKit: a comprehensive R package for the analysis of genome-wide DNA  
788 methylation profiles. *Genome Biology* 2012, **13**(10).  
789  
790 53. Lawrence M, Huber W, Pages H, Aboyoun P, Carlson M, Gentleman R, *et al.*  
791 Software for computing and annotating genomic ranges. *PLoS computational*  
792 *biology* 2013, **9**(8): e1003118.  
793  
794 54. Wang HQ, Tuominen LK, Tsai CJ. SLIM: a sliding linear model for estimating the  
795 proportion of true null hypotheses in datasets with dependence structures.  
796 *Bioinformatics* 2011, **27**(2): 225-231.  
797  
798 55. Wickham H. ggplot2: Elegant Graphics for Data Analysis. *Springer-Verlag New*  
799 *York* 2016.  
800  
801 56. Hench K. <https://github.com/k-hench/hypoimg>. 2019.  
802  
803 57. Akalin A, Franke V, Vlahoviček K, Mason CE, Schübeler D. Genomation: a toolkit  
804 to summarize, annotate and visualize genomic intervals. *Bioinformatics* 2014,  
805 **31**(7): 1127-1129.  
806  
807 58. Falcon S, Gentleman R. Using GOstats to test gene lists for GO term association.  
808 *Bioinformatics* 2006, **23**(2): 257-258.  
809  
810 59. Weir BS, Cockerham CC. Estimating F-statistics for the analysis of population  
811 structure. *Evolution* 1984, **38**(6): 1358-1370.  
812  
813
